# Supplementary material for: Designing molecular rectifiers and spin valves using metallocene-functionalized undecanethiolates: one transition metal atom matters
Source: Royal Society of Chemistry journal article supplement (doi:10.1039/c7tc05518h), 2018-01-01
Supplement: c7tc05518h1.pdf [file c7tc05518h1.pdf]

## Supporting information for

### Designing molecular rectifiers and spin valves using metallocene-functionalized undecanethiolates: one transition metal atom matters

Guang-Ping Zhang,<sup>\*a,b</sup> Yan-Qi Mu,<sup>a</sup> Ming-Zhi Wei,<sup>a,c</sup> Shan Wang,<sup>a</sup> Hui Huang,<sup>d</sup>

Gui-Chao Hu,<sup>a,b</sup> Zong-Liang Li,<sup>a</sup> and Chuan-Kui Wang<sup>\*a</sup>

<sup>a</sup>*Shandong Province Key Laboratory of Medical Physics and Image Processing Technology, School of Physics and Electronics, Shandong Normal University, Jinan 250358, China*

<sup>b</sup>*Institute of Materials and Clean Energy, Shandong Normal University, Jinan 250014, China*

<sup>c</sup>*School of Materials Science and Engineering, Qilu University of Technology (Shandong Academy of Sciences), Jinan 250353, China*

<sup>d</sup>*School of Chemistry and Pharmaceutical Engineering, Qilu University of Technology (Shandong Academy of Sciences), Jinan 250353, China*

\*Authors to whom correspondence should be addressed.

E-mail addresses: [zhangguangping@sdu.edu.cn](mailto:zhangguangping@sdu.edu.cn) (G.-P. Zhang), [ckwang@sdu.edu.cn](mailto:ckwang@sdu.edu.cn) (C.-K. Wang).

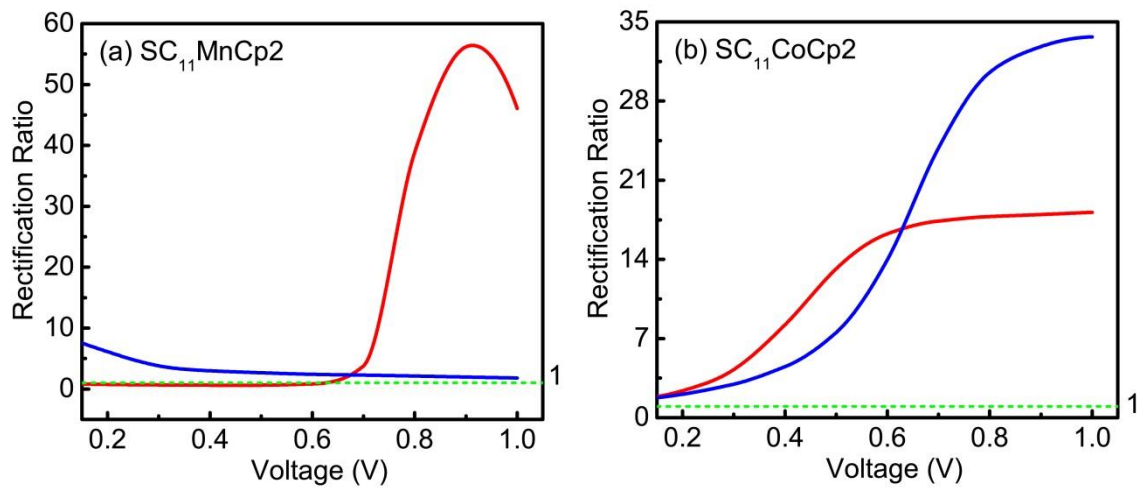

**Figure S1.** Spin-resolved rectification ratios of the spin-up current-voltage curve (red line) and spin-down current-voltage curve (blue line) for (a)  $SC_{11}MnCp2$  junction and (b)  $SC_{11}CoCp2$  junction.

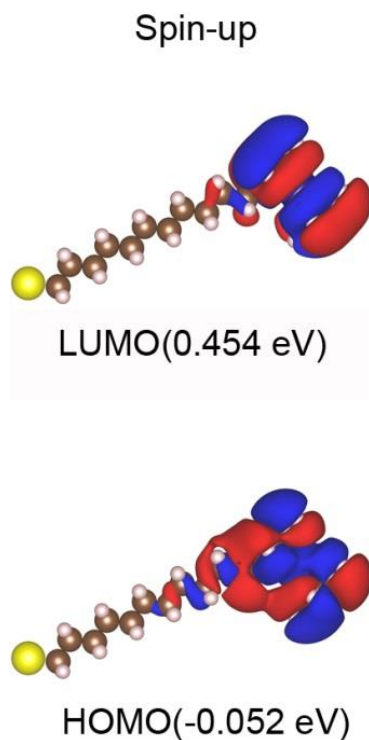

**Figure S2.** Spatial distributions of frontier MPSH molecular orbitals at zero bias voltage for  $\text{SC}_{11}\text{CrCp2}$  junction (the isovalue is 0.002).

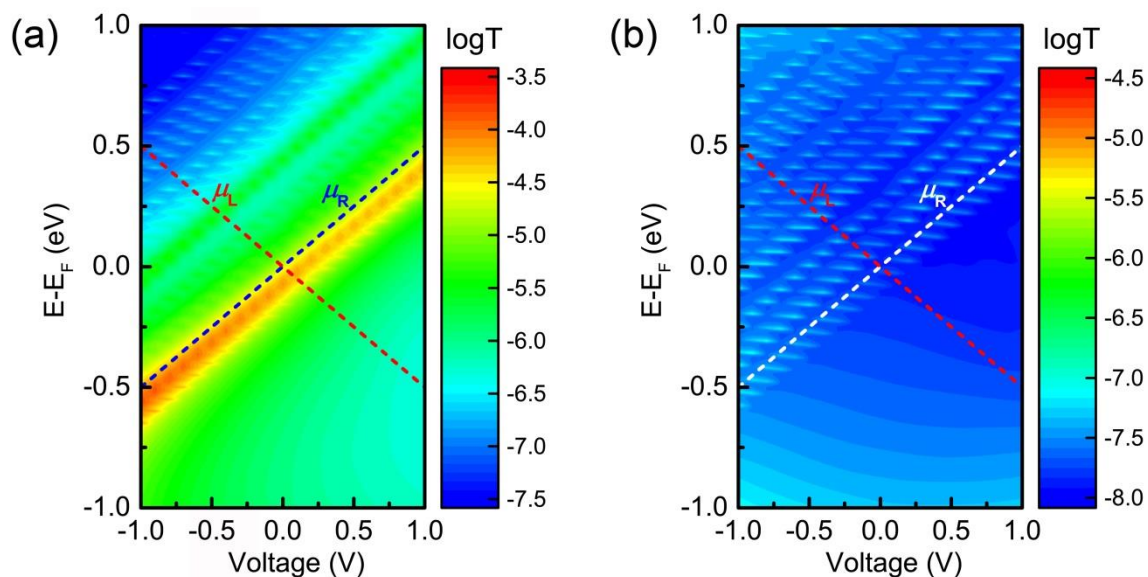

**Figure S3.** (a) Spin-up and (b) spin-down electronic transmission spectra in logarithmic scale at different bias voltages for  $\text{SC}_{11}\text{CrCp2}$  junction. The dashed lines indicate the chemical potentials of the electrodes, and the energy range between them is the bias window.

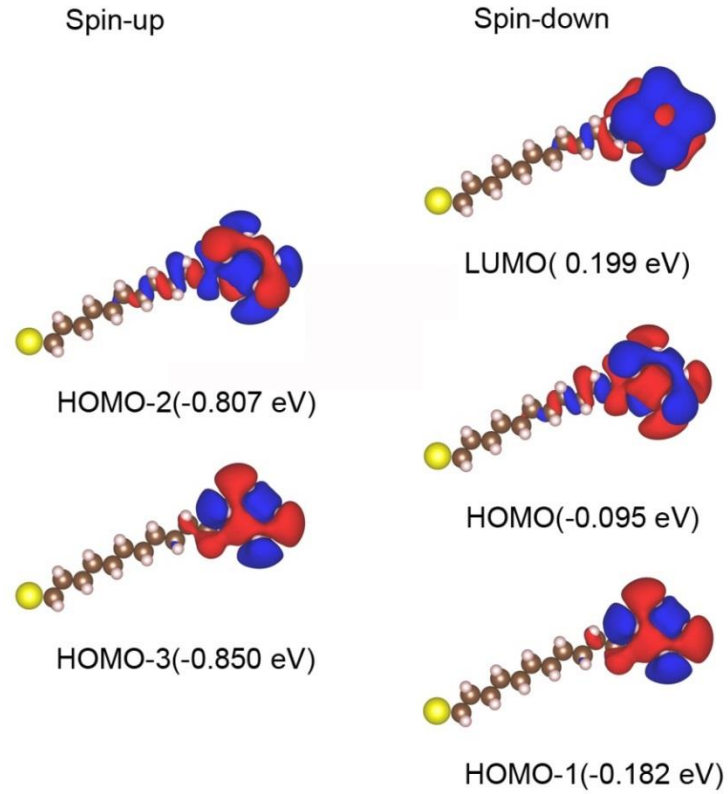

**Figure S4.** Spatial distributions of frontier MPSH molecular orbitals at zero bias voltage for  $SC_{11}MnCp_2$  junction (the isovalue is 0.002).

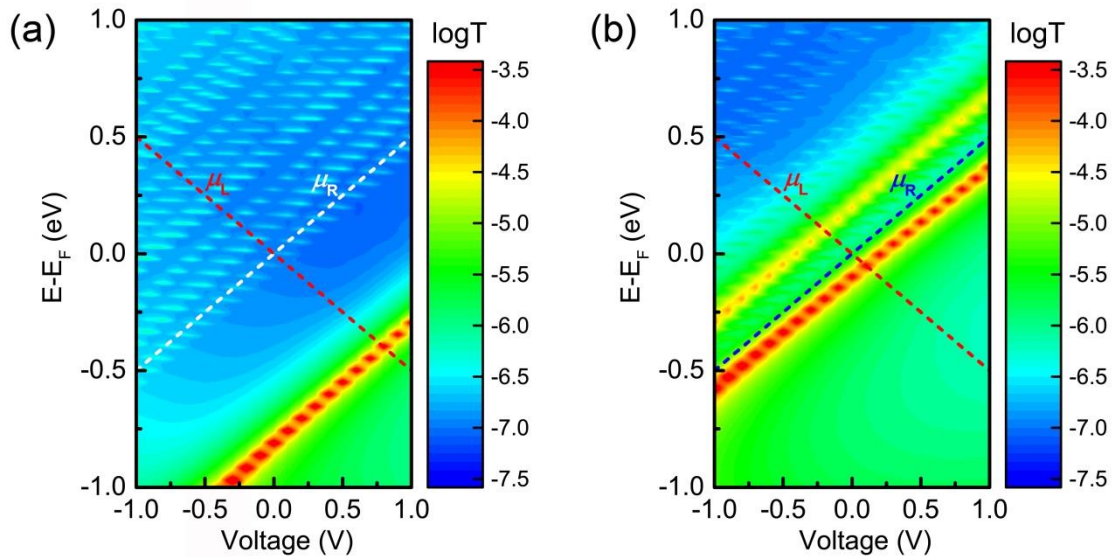

**Figure S5.** (a) Spin-up and (b) spin-down electronic transmission spectra in logarithmic scale at different bias voltages for  $SC_{11}MnCp_2$  junction. The dashed lines indicate the chemical potentials of the electrodes, and the energy range between them is the bias window.

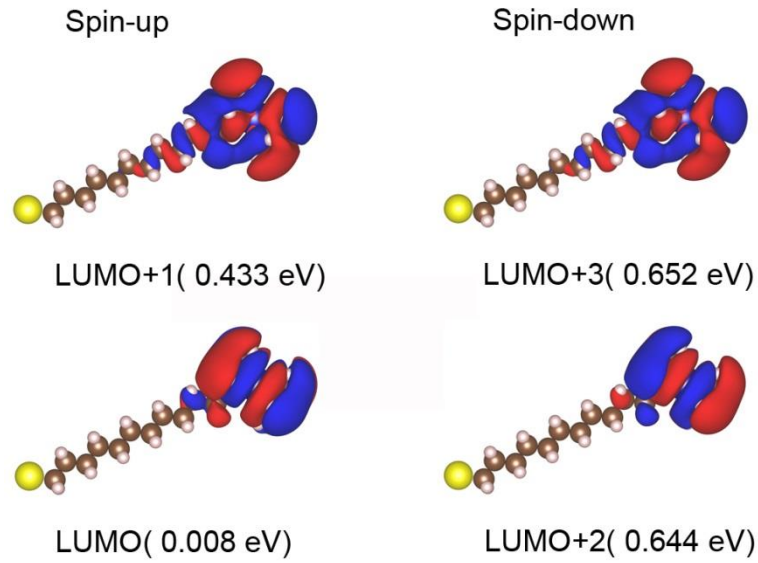

**Figure S6.** Spatial distributions of frontier MPSH molecular orbitals at zero bias voltage for  $SC_{11}CoCp_2$  junction (the isovalue is 0.002).

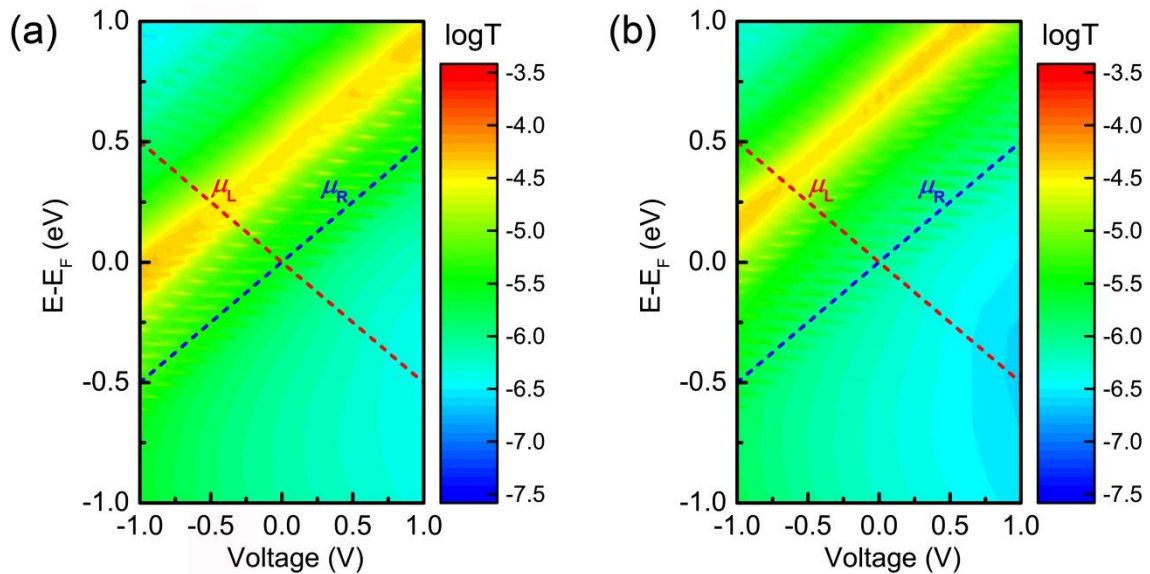

**Figure S7.** (a) Spin-up and (b) spin-down electronic transmission spectra in logarithmic scale at different bias voltages for  $SC_{11}CoCp_2$  junction. The dashed lines indicate the chemical potentials of the electrodes, and the energy range between them is the bias window.

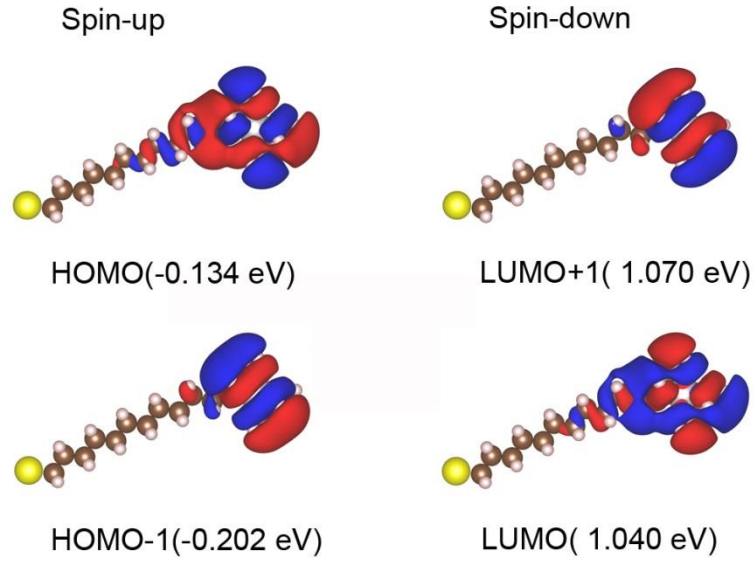

**Figure S8.** Spatial distributions of frontier MPSH molecular orbitals at zero bias voltage for  $SC_{11}NiCp_2$  junction (the isovalue is 0.002).

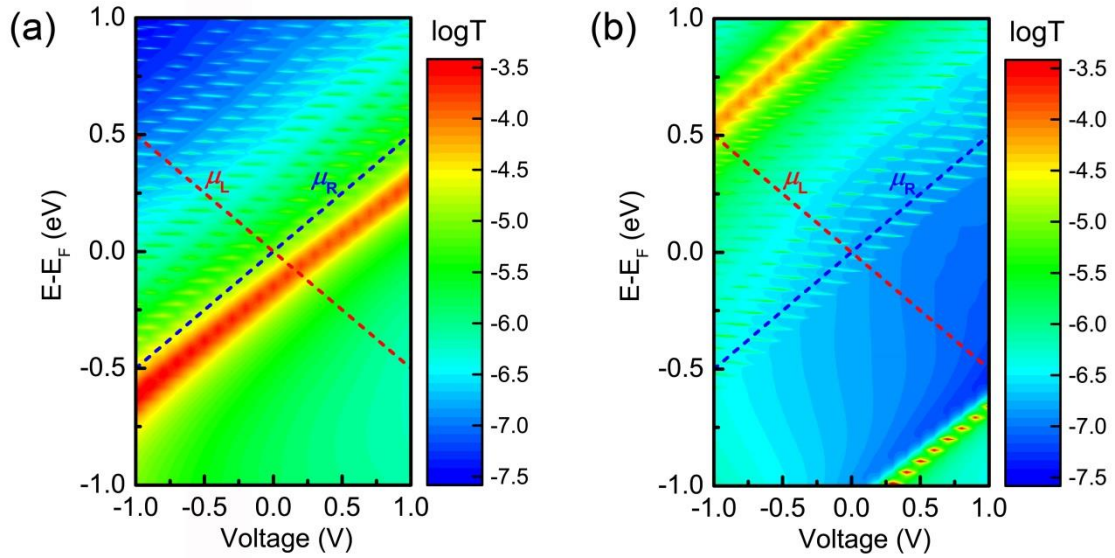

**Figure S9.** (a) Spin-up and (b) spin-down electronic transmission spectra in logarithmic scale at different bias voltages for  $SC_{11}NiCp_2$  junction. The dashed lines indicate the chemical potentials of the electrodes, and the energy range between them is the bias window.
